# Supplementary material for: A randomised controlled trial of neuromuscular stimulation in non-operative venous disease improves clinical and symptomatic status
Source: PubMed Central journal article supplement — Phlebology. 2020 Nov 11;36(4):290–302. doi: 10.1177/0268355520968640 (PMC8044600; doi:10.1177/0268355520968640), 2020-11-11
Supplement: sj-pdf-1-phl-10.1177_0268355520968640.pdf [file sj-pdf-1-phl-10.1177_0268355520968640.pdf]

# Supplementary Appendix

## Table of Contents:

|                                                                                |   |
|--------------------------------------------------------------------------------|---|
| Table of Contents: .....                                                       | 1 |
| Supplementary Appendix 1 – CEAP Classification.....                            | 2 |
| Supplementary Appendix 2 – Inclusion and Exclusion Criteria.....               | 4 |
| Supplementary Appendix 3 – Study Flow Diagram .....                            | 5 |
| Supplementary Appendix 4 – Quality of Life and Clinical Severity Scores: ..... | 6 |
| Supplementary Appendix 5 – Limb Volume:.....                                   | 7 |
| Supplementary Appendix 6 – Generic Quality of Life Measures:.....              | 8 |
| Supplementary Appendix 7 – Venous Duplex Findings: .....                       | 9 |

## Supplementary Appendix 1 – CEAP Classification

### CEAP Classification

C Clinical signs, (Grade 0-6) ed by (A) for asymptomatic and (S) for symptomatic presentation

E For a(E)tiological classification (congenital, primary, secondary)

A For Anatomical distribution (superficial, deep or perforator, alone or in combination)

P For Pathophysiological dysfunction (reflux or obstruction, alone or in combination)

### Clinical Classification

Grade 0 No visible, or palpable signs of venous disease

Grade 1 Telangiectases or reticular veins

Grade 2 Varicose veins

Grade 3 Oedema

Grade 4a Pigmentation and/or eczema

Grade 4b Lipodermatosclerosis and/or atrophie blanche

Grade 5 Healed venous ulcer

Grade 6 Active venous ulcer

### A(E)tiological Classification

Ec Congenital

Ep Primary

Es Secondary

En No venous aetiology identified

### Anatomical Classification

As Superficial veins

Ad Deep veins

Ap            Perforating veins  
An            No venous location identified

**Pathyphysiological classification**

Pr            Reflux  
Pr            Obstruction  
Pr,o          Reflux and obstruction  
Pn            No venous pathophysiology

## Supplementary Appendix 2 – Inclusion and Exclusion Criteria

### Inclusion Criteria

Patients with chronic venous insufficiency who have the following are eligible for the study:

- Able to understand the study and provide meaningful written informed consent for the study.
- Willing, able, and committed to participate in the procedures for the full length of the study.
- All ethnic groups, male or female above the age of 18 years.
- Diagnosis of chronic venous insufficiency (C3-C5 CEAP Classification)
- Blood pressure currently under moderate control (< 160/100mmHg)
- No current foot ulceration

### 4.3 Exclusion Criteria

Patients meeting any of the following criteria are to be excluded:

- Has an unstable condition (eg, psychiatric disorder, a recent history of substance abuse) that would affect compliance with protocol
- Pregnant
- Has a cardiac pacemaker, AICD or other implanted electrical device
- Has an Existing DVT.
- Has recent lower limb injury or lower back pain
- Has current foot ulceration or other skin ulcers
- Has any disorder that, in the opinion of the Investigator, might interfere with the conduct of the study.
- Has an ABPI < 0.8

## Supplementary Appendix 3 – Study Flow Diagram

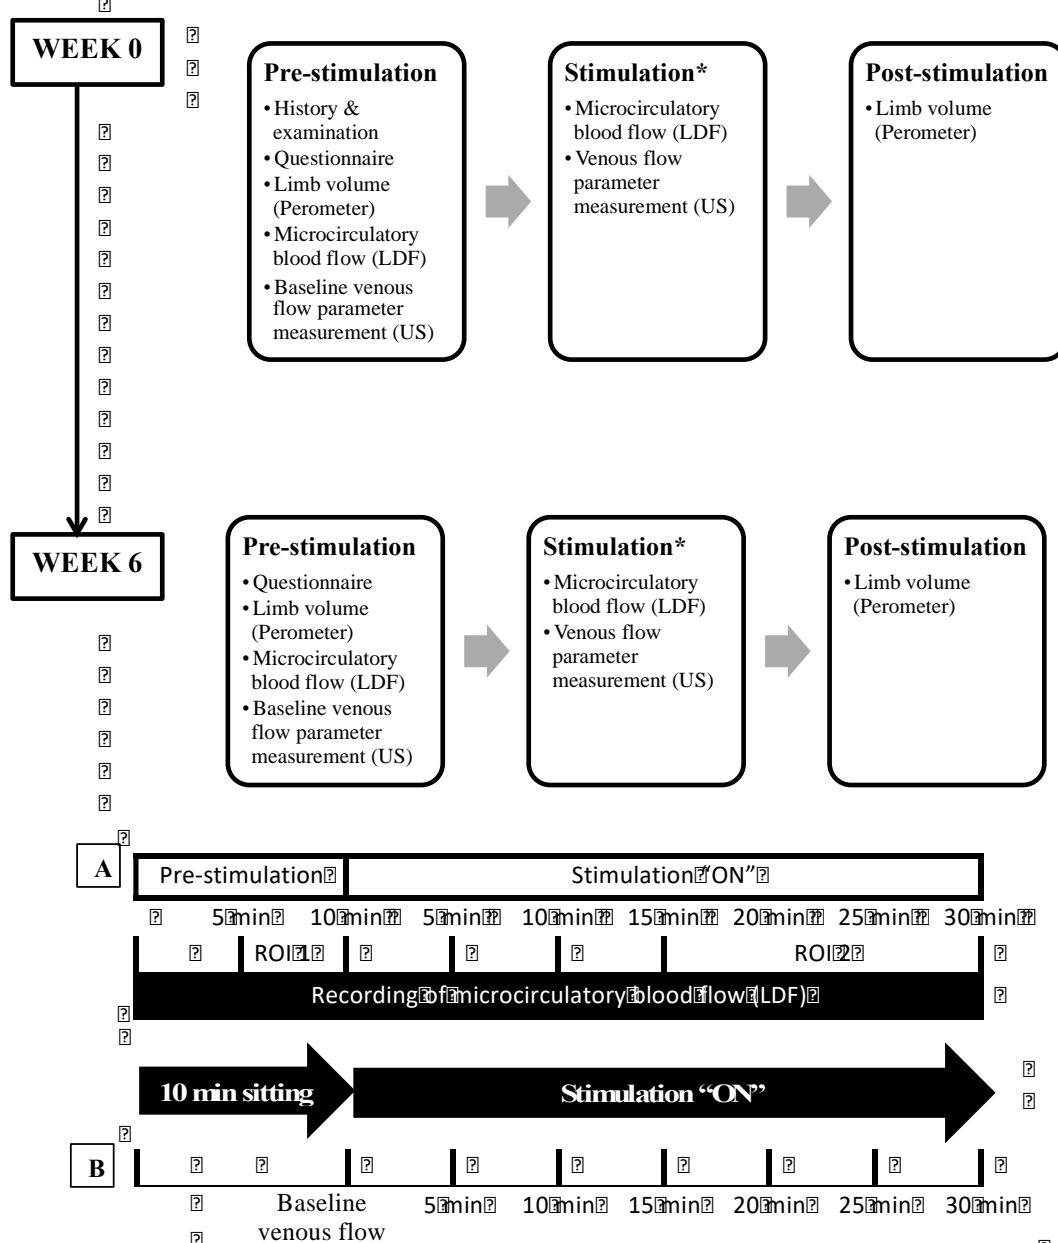

Illustration of timings of microcirculatory blood flow (laser Doppler fluximetry) and venous flow parameter (ultrasound) measurements. Stimulation "ON" applies to Group B and Group C. Group A underwent a period of quiet sitting during this period.

A) Microcirculatory blood flow was recorded as % change from baseline  $[(ROI2 - ROI1) / ROI1 \times 100]$ .

B) Venous flow parameters were calculated as  $[(\text{average of 6 measurements during stimulation "on"}) / \text{baseline venous flow} \times 100]$

(LDF laser doppler fluximeter, min minutes, ROI region of interest.)

## Supplementary Appendix 4 – Quality of Life and Clinical Severity Scores:

| <b>AVVQ</b>          | 0 weeks<br>Group A | 0 weeks<br>Group B | 0 weeks<br>Group C | 6 weeks<br>Group A | 6 weeks<br>Group B | 6 weeks<br>Group C |
|----------------------|--------------------|--------------------|--------------------|--------------------|--------------------|--------------------|
| Number of values     | 24                 | 25                 | 25                 | 24                 | 23                 | 20                 |
| Minimum              | 5.270              | 4.510              | 3.560              | 4.710              | 4.510              | 5.830              |
| 25% Percentile       | 10.13              | 16.34              | 11.91              | 11.30              | 14.99              | 11.04              |
| Median               | 18.62              | 21.07              | 21.30              | 19.72              | 18.86              | 15.01              |
| 75% Percentile       | 26.83              | 29.47              | 31.33              | 25.38              | 28.52              | 21.31              |
| Maximum              | 40.33              | 37.55              | 49.18              | 67.21              | 44.45              | 46.68              |
| Mean                 | 19.27              | 22.40              | 23.19              | 21.07              | 21.13              | 17.04              |
| Std. Deviation       | 9.985              | 8.969              | 12.19              | 13.46              | 9.425              | 9.203              |
| Std. Error of Mean   | 2.038              | 1.794              | 2.437              | 2.747              | 1.965              | 2.058              |
| Lower 95% CI of mean | 15.06              | 18.69              | 18.16              | 15.39              | 17.06              | 12.73              |
| Upper 95% CI of mean | 23.49              | 26.10              | 28.23              | 26.75              | 25.21              | 21.35              |

| <b>VCSS</b>          | 0 weeks<br>Group A | 0 weeks<br>Group B | 0 weeks<br>Group C | 6 weeks<br>Group A | 6 weeks<br>Group B | 6 weeks<br>Group C |
|----------------------|--------------------|--------------------|--------------------|--------------------|--------------------|--------------------|
| Number of values     | 25                 | 25                 | 26                 | 25                 | 23                 | 25                 |
| Minimum              | 2.000              | 2.000              | 0.000              | 2.000              | 2.000              | 0.000              |
| 25% Percentile       | 4.500              | 5.000              | 4.750              | 5.000              | 4.000              | 2.000              |
| Median               | 6.000              | 6.000              | 7.000              | 7.000              | 5.000              | 3.000              |
| 75% Percentile       | 8.000              | 8.000              | 9.250              | 9.500              | 8.000              | 6.500              |
| Maximum              | 12.00              | 13.00              | 15.00              | 13.00              | 14.00              | 9.000              |
| Mean                 | 6.320              | 6.880              | 7.462              | 7.320              | 6.087              | 4.000              |
| Std. Deviation       | 2.410              | 2.728              | 3.797              | 2.996              | 2.937              | 3.028              |
| Std. Error of Mean   | 0.4821             | 0.5456             | 0.7447             | 0.5992             | 0.6125             | 0.6055             |
| Lower 95% CI of mean | 5.325              | 5.754              | 5.928              | 6.083              | 4.817              | 2.750              |
| Upper 95% CI of mean | 7.315              | 8.006              | 8.995              | 8.557              | 7.357              | 5.250              |

| <b>VDS</b>           | 0 weeks<br>Group A | 0 weeks<br>Group B | 0 weeks<br>Group C | 6 weeks<br>Group A | 6 weeks<br>Group B | 6 weeks<br>Group C |
|----------------------|--------------------|--------------------|--------------------|--------------------|--------------------|--------------------|
| Number of values     | 25                 | 25                 | 25                 | 25                 | 23                 | 20                 |
| Minimum              | 1.000              | 1.000              | 1.000              | 1.000              | 1.000              | 1.000              |
| 25% Percentile       | 1.000              | 1.000              | 1.000              | 1.000              | 1.000              | 1.000              |
| Median               | 1.000              | 2.000              | 1.000              | 1.000              | 1.000              | 1.000              |
| 75% Percentile       | 2.000              | 2.000              | 2.000              | 2.000              | 2.000              | 1.750              |
| Maximum              | 3.000              | 3.000              | 3.000              | 3.000              | 3.000              | 3.000              |
| Mean                 | 1.520              | 1.800              | 1.560              | 1.400              | 1.609              | 1.350              |
| Std. Deviation       | 0.6532             | 0.7638             | 0.6506             | 0.5774             | 0.7827             | 0.6708             |
| Std. Error of Mean   | 0.1306             | 0.1528             | 0.1301             | 0.1155             | 0.1632             | 0.1500             |
| Lower 95% CI of mean | 1.250              | 1.485              | 1.291              | 1.162              | 1.270              | 1.036              |
| Upper 95% CI of mean | 1.790              | 2.115              | 1.829              | 1.638              | 1.947              | 1.664              |

## Supplementary Appendix 5 – Limb Volume:

|                         | 0     | 0     | 0     | 0     | 0     | 0     | 6     | 6     | 6     | 6     | 6     | 6     |
|-------------------------|-------|-------|-------|-------|-------|-------|-------|-------|-------|-------|-------|-------|
|                         | weeks |
|                         | A     | A     | B     | B     | C     | C     | A     | A     | B     | B     | C     | C     |
| <b>Limb Volume</b>      | pre   | post  |
| Number of values        | 25    | 25    | 24    | 24    | 25    | 25    | 25    | 25    | 22    | 22    | 21    | 20    |
| Minimum                 | 2467  | 3039  | 2875  | 2941  | 2754  | 2733  | 3033  | 3063  | 3006  | 2987  | 2860  | 2846  |
| 25% Percentile          | 3929  | 3991  | 4038  | 4059  | 4090  | 4125  | 3978  | 4020  | 3900  | 3888  | 4127  | 4031  |
| Median                  | 4464  | 4537  | 4618  | 4600  | 4674  | 4685  | 4599  | 4645  | 4631  | 4646  | 4749  | 4704  |
| 75% Percentile          | 6651  | 6656  | 5479  | 5539  | 5476  | 5490  | 6541  | 6599  | 5377  | 5437  | 5789  | 5502  |
| Maximum                 | 7186  | 7276  | 11707 | 11797 | 9097  | 9148  | 7944  | 8017  | 11158 | 11320 | 9366  | 8748  |
| Mean                    | 4966  | 5039  | 5092  | 5117  | 5029  | 5048  | 5051  | 5091  | 4969  | 4982  | 5129  | 4901  |
| Std. Deviation          | 1415  | 1394  | 1891  | 1904  | 1535  | 1551  | 1448  | 1463  | 1765  | 1795  | 1616  | 1311  |
| Std. Error of Mean      | 282.9 | 278.7 | 385.9 | 388.6 | 307.0 | 310.2 | 289.5 | 292.7 | 376.3 | 382.6 | 352.6 | 293.0 |
| Lower 95% CI of mean    | 4382  | 4464  | 4294  | 4313  | 4395  | 4407  | 4453  | 4487  | 4186  | 4186  | 4394  | 4287  |
| Upper 95% CI of mean    | 5550  | 5614  | 5891  | 5921  | 5663  | 5688  | 5648  | 5696  | 5751  | 5778  | 5865  | 5514  |
| 95% CI of median        | 95.67 | 95.67 | 97.73 | 97.73 | 95.67 | 95.67 | 95.67 | 95.67 | 98.31 | 98.31 | 97.34 | 95.86 |
| Actual confidence level | %     | %     | %     | %     | %     | %     | %     | %     | %     | %     | %     | %     |
| Lower confidence limit  | 4004  | 4012  | 4108  | 4165  | 4206  | 4203  | 4123  | 4133  | 3915  | 3897  | 4230  | 4223  |
| Upper confidence limit  | 6178  | 6305  | 5220  | 5305  | 5399  | 5391  | 6001  | 6059  | 5301  | 5393  | 5497  | 5289  |

## Supplementary Appendix 6 – Generic Quality of Life Measures:

| <b>EQ-5D QOL</b>     | 0 weeks<br>Group A | 0 weeks<br>Group B | 0 weeks<br>Group C | 6 weeks<br>Group A | 6 weeks<br>Group B | 6 weeks<br>Group C |
|----------------------|--------------------|--------------------|--------------------|--------------------|--------------------|--------------------|
| Number of values     | 24                 | 25                 | 25                 | 25                 | 23                 | 20                 |
| Minimum              | 0.2060             | -0.08700           | 0.01900            | 0.1110             | -0.1420            | 0.1120             |
| 25% Percentile       | 0.6268             | 0.2355             | 0.5500             | 0.5860             | 0.4580             | 0.4880             |
| Median               | 0.6840             | 0.6420             | 0.7250             | 0.7350             | 0.6910             | 0.7535             |
| 75% Percentile       | 0.7670             | 0.7440             | 0.8230             | 0.7670             | 0.7670             | 0.8368             |
| Maximum              | 0.9060             | 1.000              | 1.000              | 1.000              | 1.000              | 1.000              |
| Mean                 | 0.6720             | 0.5406             | 0.6676             | 0.6566             | 0.5994             | 0.6611             |
| Std. Deviation       | 0.1504             | 0.3031             | 0.2225             | 0.2126             | 0.2763             | 0.2742             |
| Std. Error of Mean   | 0.03069            | 0.06061            | 0.04450            | 0.04253            | 0.05761            | 0.06131            |
| Lower 95% CI of mean | 0.6086             | 0.4155             | 0.5757             | 0.5688             | 0.4799             | 0.5327             |
| Upper 95% CI of mean | 0.7355             | 0.6657             | 0.7594             | 0.7444             | 0.7189             | 0.7894             |

| <b>EQ-5D VAS</b>     | 0 weeks<br>Group A | 0 weeks<br>Group B | 0 weeks<br>Group C | 6 weeks<br>Group A | 6 weeks<br>Group B | 6 weeks<br>Group C |
|----------------------|--------------------|--------------------|--------------------|--------------------|--------------------|--------------------|
| Number of values     | 25                 | 25                 | 25                 | 25                 | 23                 | 20                 |
| Minimum              | 30.00              | 20.00              | 25.00              | 30.00              | 7.000              | 38.00              |
| 25% Percentile       | 57.50              | 50.00              | 54.00              | 52.50              | 50.00              | 50.75              |
| Median               | 70.00              | 70.00              | 70.00              | 70.00              | 65.00              | 75.00              |
| 75% Percentile       | 80.00              | 80.00              | 80.00              | 77.50              | 85.00              | 85.00              |
| Maximum              | 95.00              | 99.00              | 100.0              | 95.00              | 95.00              | 100.0              |
| Mean                 | 67.72              | 64.68              | 67.08              | 66.28              | 63.61              | 71.20              |
| Std. Deviation       | 16.33              | 20.62              | 19.85              | 18.45              | 24.30              | 18.48              |
| Std. Error of Mean   | 3.266              | 4.124              | 3.969              | 3.691              | 5.067              | 4.131              |
| Lower 95% CI of mean | 60.98              | 56.17              | 58.89              | 58.66              | 53.10              | 62.55              |
| Upper 95% CI of mean | 74.46              | 73.19              | 75.27              | 73.90              | 74.12              | 79.85              |

| <b>SF12 - PCS</b>    | 0 weeks<br>Group A | 0 weeks<br>Group B | 0 weeks<br>Group C | 6 weeks<br>Group A | 6 weeks<br>Group B | 6 weeks<br>Group C |
|----------------------|--------------------|--------------------|--------------------|--------------------|--------------------|--------------------|
| Number of values     | 25                 | 24                 | 24                 | 24                 | 23                 | 20                 |
| Minimum              | 15.39              | 21.58              | 26.77              | 18.17              | 22.19              | 32.56              |
| 25% Percentile       | 35.91              | 33.34              | 41.10              | 31.89              | 33.59              | 43.45              |
| Median               | 41.98              | 40.61              | 48.95              | 47.68              | 45.10              | 51.82              |
| 75% Percentile       | 52.69              | 52.63              | 55.52              | 54.31              | 53.34              | 55.99              |
| Maximum              | 58.38              | 60.11              | 59.59              | 59.23              | 58.17              | 65.90              |
| Mean                 | 42.03              | 42.02              | 47.30              | 43.73              | 43.32              | 49.89              |
| Std. Deviation       | 11.42              | 12.06              | 8.543              | 12.00              | 10.88              | 8.277              |
| Std. Error of Mean   | 2.283              | 2.461              | 1.744              | 2.450              | 2.268              | 1.851              |
| Lower 95% CI of mean | 37.32              | 36.93              | 43.69              | 38.66              | 38.61              | 46.02              |
| Upper 95% CI of mean | 46.74              | 47.11              | 50.90              | 48.80              | 48.02              | 53.77              |

| <b>SF12 - MCS</b>    | 0 weeks<br>Group A | 0 weeks<br>Group B | 0 weeks<br>Group C | 6 weeks<br>Group A | 6 weeks<br>Group B | 6 weeks<br>Group C |
|----------------------|--------------------|--------------------|--------------------|--------------------|--------------------|--------------------|
| Number of values     | 25                 | 24                 | 24                 | 24                 | 23                 | 20                 |
| Minimum              | 26.54              | 25.31              | 23.97              | 28.29              | 25.16              | 17.10              |
| 25% Percentile       | 49.41              | 43.16              | 42.41              | 48.24              | 41.26              | 41.01              |
| Median               | 55.11              | 52.38              | 47.96              | 53.93              | 50.37              | 50.03              |
| 75% Percentile       | 59.47              | 56.75              | 55.76              | 57.16              | 55.47              | 55.18              |
| Maximum              | 69.47              | 64.41              | 67.20              | 65.16              | 61.57              | 62.91              |
| Mean                 | 53.26              | 50.26              | 48.01              | 51.13              | 48.49              | 48.17              |
| Std. Deviation       | 10.27              | 9.455              | 10.06              | 9.560              | 9.332              | 10.54              |
| Std. Error of Mean   | 2.053              | 1.930              | 2.054              | 1.951              | 1.946              | 2.357              |
| Lower 95% CI of mean | 49.02              | 46.26              | 43.76              | 47.10              | 44.45              | 43.24              |
| Upper 95% CI of mean | 57.49              | 54.25              | 52.26              | 55.17              | 52.52              | 53.10              |



## Supplementary Appendix 7 – Venous Duplex Findings:

|     | GSV SVI | SSV SVI | ATV SVI | VV SVI | Iliac DVI | SFV DVI | PFV DVI | Calf DVI | Disease Segment Count | Superficial territories | Deep territories | Mixed? | Obstruction |
|-----|---------|---------|---------|--------|-----------|---------|---------|----------|-----------------------|-------------------------|------------------|--------|-------------|
| Sum | 23      | 13      | 7       | 39     | 18        | 47      | 11      | 30       | 172                   | 81                      | 91               | 34     | 16          |

| ID    | GSV SVI | SSV SVI | ATV SVI | VV SVI | Iliac DVI | SFV DVI | PFV DVI | Calf DVI |
|-------|---------|---------|---------|--------|-----------|---------|---------|----------|
| RVD01 | 0       | 0       | 0       | 0      | 0         | 1       | 0       | 1        |
| RVD02 | 0       | 0       | 0       | 0      | 0         | 0       | 1       | 1        |
| RVD03 | 0       | 0       | 1       | 1      | 1         | 2       | 1       | 0        |
| RVD04 | 0       | 0       | 0       | 1      | 0         | 0       | 0       | 0        |
| RVD05 | 0       | 0       | 0       | 0      | 0         | 2       | 0       | 1        |
| RVD06 | 0       | 1       | 0       | 0      | 2         | 2       | 0       | 1        |
| RVD07 | 0       | 0       | 0       | 1      | 0         | 0       | 0       | 0        |
| RVD08 | 0       | 0       | 0       | 1      | 1         | 1       | 1       | 0        |
| RVD09 | 0       | 0       | 0       | 1      | 0         | 0       | 0       | 1        |
| RVD10 | 0       | 0       | 0       | 0      | 0         | 0       | 0       | 0        |
| RVD11 | 0       | 1       | 0       | 1      | 1         | 1       | 1       | 1        |
| RVD12 | 0       | 0       | 0       | 1      | 0         | 0       | 0       | 1        |
| RVD13 |         |         |         |        |           |         |         |          |
| RVD14 | 0       | 0       | 0       | 0      | 0         | 0       | 0       | 1        |
| RVD15 |         |         |         |        |           |         |         |          |
| RVD16 | 1       | 0       | 1       | 1      | 0         | 0       | 0       | 1        |
| RVD17 | 0       | 1       | 0       | 0      | 0         | 0       | 0       | 0        |
| RVD18 | 0       | 0       | 0       | 1      | 0         | 1       | 1       | 1        |
| RVD19 | 0       | 1       | 0       | 1      | 0         | 1       | 0       | 1        |
| RVD20 | 0       | 0       | 0       | 0      | 0         | 1       | 0       | 1        |
| RVD21 | 0       | 0       | 0       | 0      | 0         | 1       | 0       | 1        |
| RVD22 | 0       | 0       | 0       | 1      | 0         | 1       | 0       | 0        |
| RVD23 | 0       | 1       | 0       | 1      | 1         | 1       | 1       | 1        |
| RVD24 | 0       | 0       | 0       | 1      | 0         | 0       | 0       | 0        |
| RVD25 | 0       | 0       | 0       | 0      | 0         | 0       | 0       | 1        |
| RVD26 | 0       | 0       | 0       | 0      | 0         | 1       | 0       | 0        |
| RVD27 | 1       | 0       | 0       | 0      | 1         | 1       | 0       | 0        |
| RVD28 | 1       | 1       | 0       | 0      | 0         | 2       | 0       | 0        |
| RVD29 | 0       | 0       | 0       | 1      | 0         | 0       | 0       | 0        |
| RVD30 | 0       | 0       | 0       | 0      | 2         | 2       | 0       | 0        |
| RVD31 | 0       | 0       | 0       | 1      | 0         | 0       | 0       | 0        |
| RVD32 | 1       | 0       | 0       | 0      | 0         | 1       | 0       | 1        |
| RVD33 | 0       | 0       | 0       | 0      | 2         | 2       | 2       | 0        |
| RVD34 |         |         |         |        |           |         |         |          |
| RVD35 |         |         |         |        |           |         |         |          |
| RVD36 | 0       | 0       | 0       | 1      | 0         | 0       | 0       | 0        |
| RVD37 | 1       | 0       | 0       | 0      | 0         | 1       | 0       | 1        |
| RVD38 | 0       | 0       | 0       | 0      | 0         | 1       | 0       | 1        |
| RVD39 |         |         |         |        |           |         |         |          |
| RVD40 | 0       | 0       | 0       | 1      | 0         | 1       | 0       | 0        |
| RVD41 | 0       | 0       | 0       | 0      | 1         | 1       | 1       | 1        |
| RVD42 | 0       | 0       | 0       | 0      | 0         | 1       | 1       | 0        |
| RVD43 | 0       | 0       | 0       | 1      | 0         | 1       | 0       | 0        |
| RVD44 | 0       | 0       | 1       | 1      | 0         | 1       | 0       | 0        |
| RVD45 | 1       | 0       | 0       | 0      | 0         | 1       | 1       | 0        |
| RVD46 | 1       | 0       | 0       | 1      | 0         | 0       | 0       | 0        |
| RVD47 | 1       | 0       | 0       | 1      | 0         | 0       | 0       | 0        |
| RVD48 | 0       | 1       | 0       | 1      | 0         | 1       | 1       | 0        |
| RVD49 | 0       | 0       | 0       | 1      | 0         | 0       | 0       | 0        |
| RVD50 | 0       | 2       | 0       | 0      | 0         | 1       | 0       | 0        |
| RVD51 | 0       | 0       | 0       | 1      | 0         | 0       | 0       | 1        |
| RVD52 | 1       | 0       | 0       | 1      | 0         | 0       | 0       | 0        |
| RVD53 | 1       | 0       | 0       | 1      | 0         | 1       | 0       | 0        |
| RVD54 | 1       | 0       | 0       | 1      | 0         | 1       | 0       | 1        |
| RVD55 | 1       | 0       | 0       | 0      | 0         | 2       | 0       | 0        |
| RVD56 | 1       | 0       | 0       | 1      | 0         | 0       | 0       | 1        |
| RVD57 | 0       | 0       | 0       | 0      | 0         | 0       | 0       | 1        |
| RVD58 | 1       | 0       | 0       | 1      | 0         | 1       | 0       | 1        |
| RVD59 | 1       | 0       | 0       | 0      | 2         | 1       | 0       | 0        |
| RVD60 | 0       | 1       | 0       | 1      | 0         | 0       | 0       | 0        |
| RVD61 | 0       | 0       | 0       | 0      | 0         | 2       | 0       | 1        |
| RVD62 | 1       | 0       | 1       | 0      | 0         | 1       | 0       | 0        |
| RVD63 | 1       | 0       | 0       | 1      | 0         | 1       | 0       | 0        |
| RVD64 | 1       | 0       | 0       | 0      | 0         | 0       | 0       | 0        |
| RVD65 | 1       | 0       | 0       | 0      | 0         | 0       | 0       | 1        |
| RVD66 | 0       | 0       | 0       | 1      | 0         | 0       | 0       | 0        |
| RVD67 | 1       | 0       | 1       | 1      | 0         | 0       | 0       | 1        |
| RVD68 | 0       | 0       | 0       | 0      | 2         | 2       | 0       | 1        |
| RVD69 | 0       | 1       | 0       | 0      | 1         | 1       | 0       | 0        |
| RVD70 | 1       | 0       | 0       | 1      | 0         | 1       | 0       | 1        |
| RVD71 | 0       | 1       | 0       | 0      | 0         | 0       | 0       | 0        |
| RVD72 | 1       | 0       | 0       | 1      | 0         | 0       | 0       | 0        |
| RVD73 | 1       | 0       | 0       | 1      | 0         | 0       | 0       | 0        |
| RVD74 | 0       | 1       | 1       | 1      | 0         | 0       | 0       | 0        |
| RVD75 |         |         |         |        |           |         |         |          |
| RVD76 | 0       | 0       | 1       | 1      | 0         | 0       | 0       | 0        |
| RVD77 | 0       | 0       | 0       | 1      | 0         | 0       | 0       | 0        |

### Legend:

0 = no disease

1 = reflux disease

2 = obstructive disease
